# Supplementary material for: Long read sequencing reveals novel isoforms and insights into splicing regulation during cell state changes
Source: bioRxiv or medRxiv preprint supplement (doi:10.1101/2021.04.27.441628), 2021-04-28
Supplement: Supplementary file [file media-1.pdf]

## **Supplementary Information: Long read sequencing reveals novel isoforms and insights into splicing regulation during cell state changes**

David J Wright<sup>1</sup>, Nicola Hall<sup>2,3</sup>, Naomi Irish<sup>1</sup>, Angela L Man<sup>1</sup>, Will Glynn<sup>1</sup>, Arne Mould<sup>2,3</sup>, Alejandro De Los Angeles<sup>2,3</sup>, Emily Angiolini<sup>1</sup>, David Swarbreck<sup>1</sup>, Karim Gharbi<sup>1</sup>, Elizabeth M Tunbridge<sup>2,3</sup>, Wilfried Haerty<sup>1\*</sup>

<sup>1</sup>Earlham Institute, Norwich Research Park, Norfolk NR5 0PB, UK

<sup>2</sup>Department of Psychiatry, Medical Sciences Division, University of Oxford, Oxfordshire OX3 3JX, UK

<sup>3</sup>National Institute for Health Research, Oxford Health Biomedical Research Centre, Oxfordshire OX3 7JX, UK

\* corresponding author: Wilfried.Haerty@earlham.ac.uk

### **Supplementary Results & Discussion**

#### ***Gene & transcript-level differential expression at more stringent log fold change thresholds***

Using more stringent threshold criteria ( $\log_{2}FC \geq 1.5$ ), 503 genes were upregulated in the differentiated cells, and 524 downregulated (Table S3), compared to the undifferentiated state (Fig 3A). These upregulated genes also showed greatest overlap with those up-regulated in the brain, compared with other tissue types ( $p_{adj} = 1.2 \times 10^{-23}$ ). Whilst the permissive data showed significant overlap with genes down-regulated in brain, this relationship was not observed at the more stringent threshold ( $p_{adj} = 1$ ).

At the transcript-level, we found a total of 884 transcripts significantly upregulated and 875 significantly downregulated in the differentiated cells (Fig 3C). These include 28 upregulated and 21 downregulated novel TALON transcripts respectively (Table S3).

## Supplementary Figures and Tables

**Figure S1** Schematic representation of the custom annotation pipeline, utilising TALON software (Wyman et al. 2020) with custom bash, python and perl auxiliary and processing scripts (collated in clean\_TALON\_output.pl, see script repository).

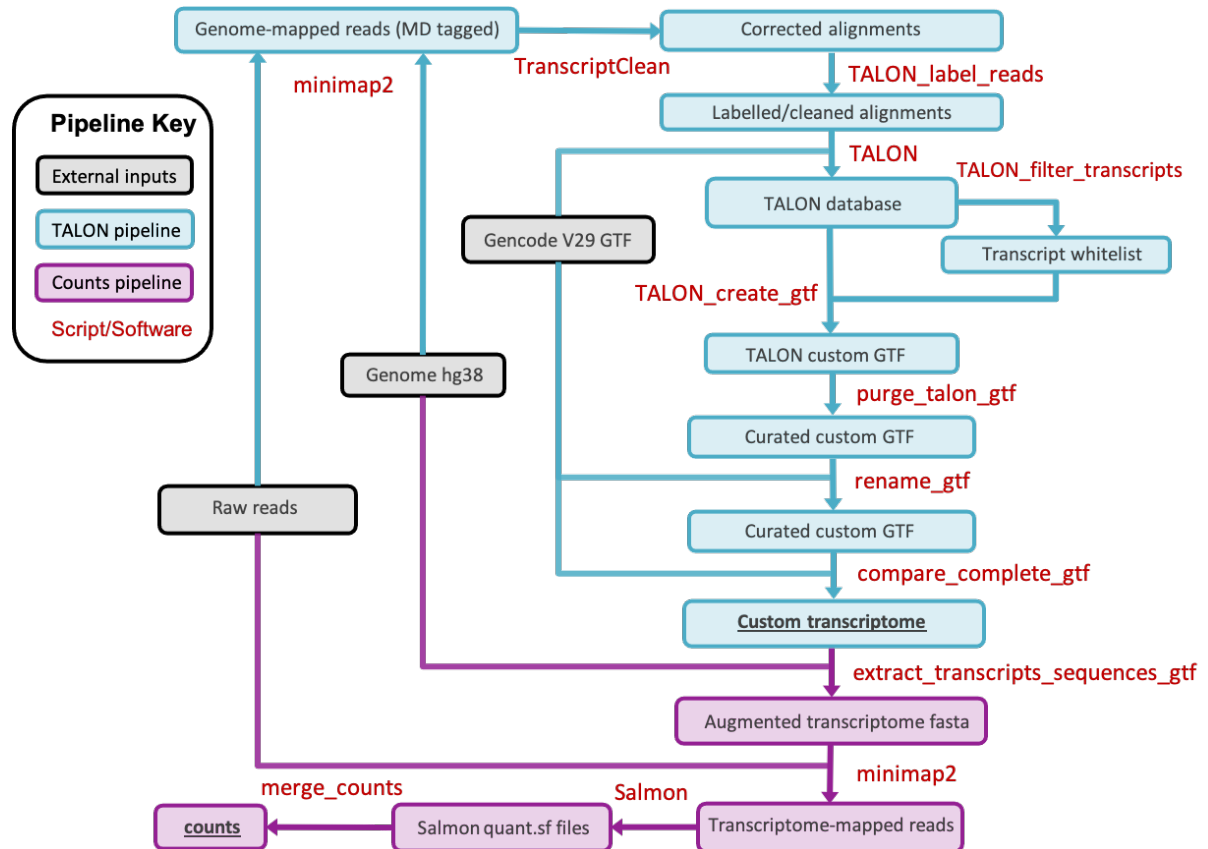

**Fig S2** Schematic representation of *CACNA2D2* (ENSG0000007402) transcripts, showing the novel transcript TALONT000703030. Figure modified from IsoformSwitchAnalyzerR output (Vitting-Seerup and Sandelin 2019).

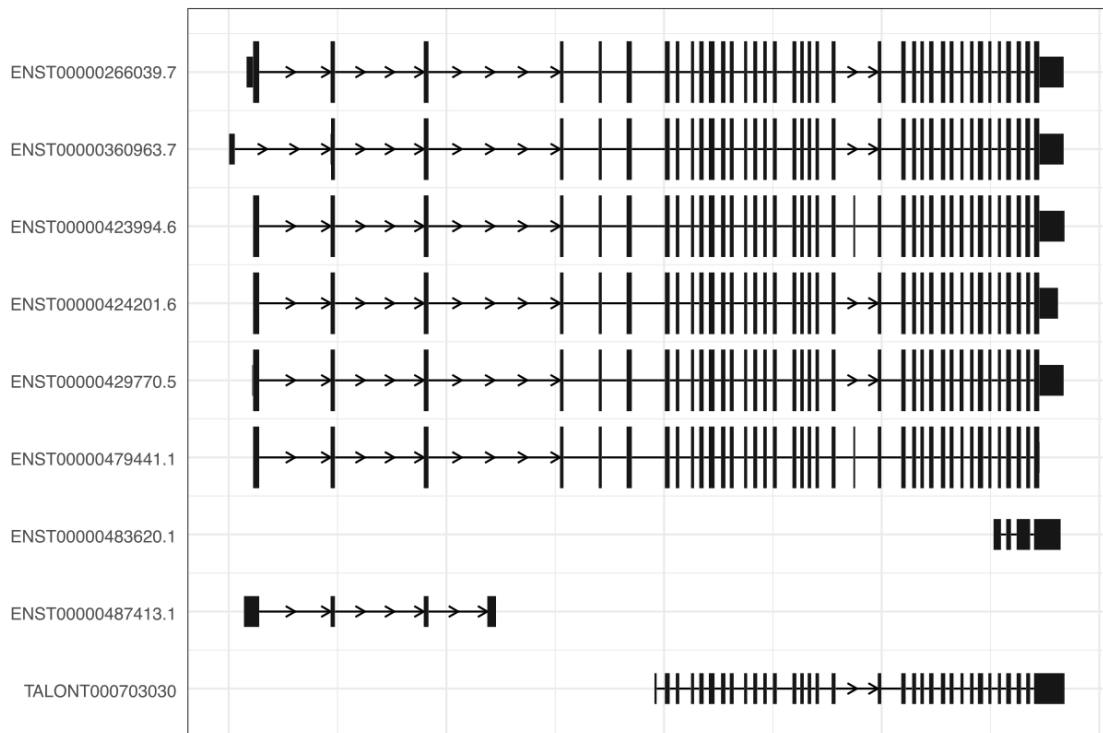

**Fig S3** Short read (Illumina paired-end) coverage plot of novel first exon (31bp) of *CACNA2D2* (ENSG0000007402) transcript TALONT000703030 from all 10 sequencing runs (see Table S1).

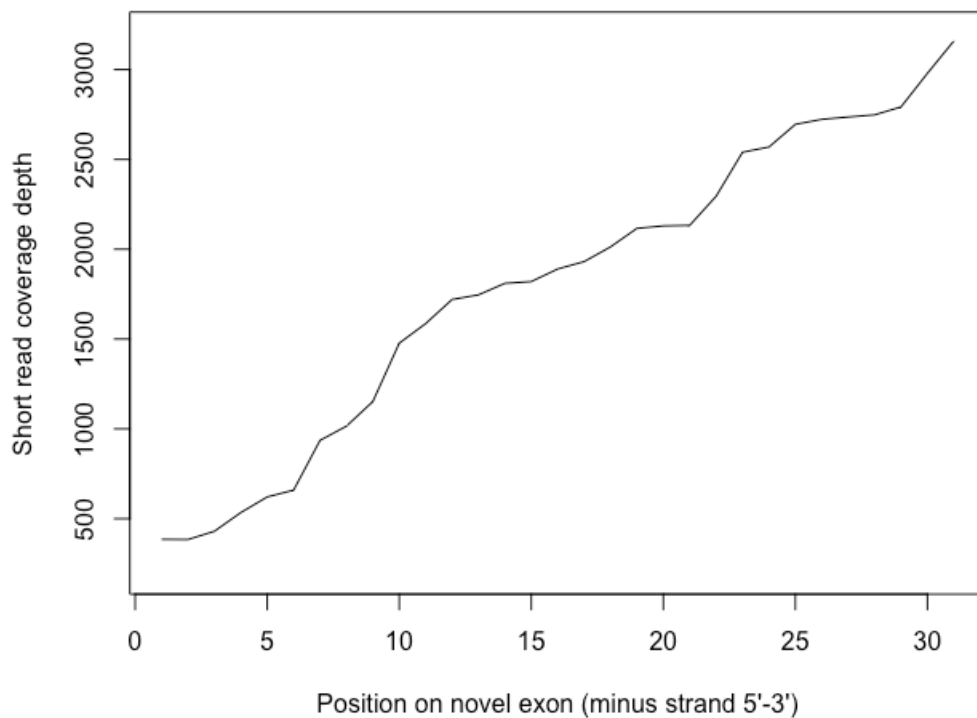

**Fig S4** Coverage plot of novel first exon (31bp) of *CACNA2D2* (ENSG0000007402) transcript TALONT000703030 from N=27 human cortex RNA-seq GTEx accessions from N=21 individuals: SRR1310008, SRR1311400, SRR1311575, SRR1315866, SRR1316815, SRR1317344, SRR1320963, SRR1323043, SRR1326179, SRR1331579, SRR1333930, SRR1337564, SRR1339651, SRR1343481, SRR1353176, SRR1354446, SRR1364676, SRR1368772, SRR1382732, SRR1383059, SRR1387809, SRR1418837, SRR1418992, SRR1433971, SRR1435293, SRR1444580, SRR1468514.

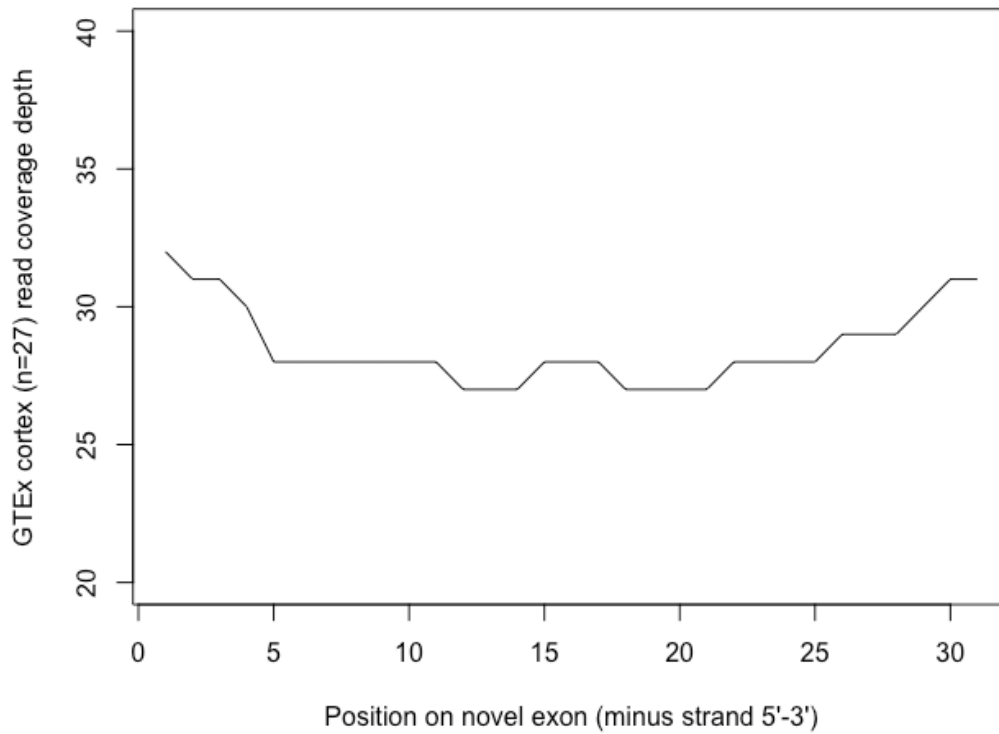

**Fig S5** Comparison of an example annotated coding transcript (ENST00000479441) of *CACNA2D2* (ENSG0000007402) with the novel transcript TALONT000703030, demonstrating key differences and initial 3D structure rendered using Phyre2 (Kelley et al. 2015).

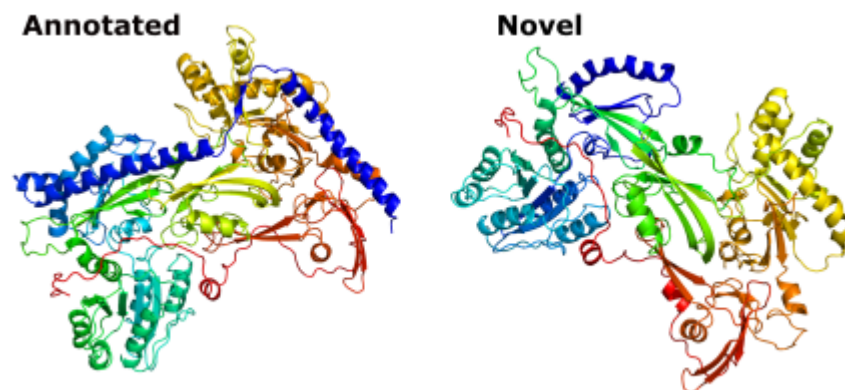

**Table S1** Summary statistics of the Oxford Nanopore Technologies (ONT) after quality checking and Illumina paired-end short read sequencing (SRS) of 10 replicate samples of human neuronal cell line SH-SY5Y. D = differentiated cell and U = undifferentiated cell samples.

| Sample ID | Reads      | Bases          | Median Length | Read N50 | Median Quality | Illumina Reads |
|-----------|------------|----------------|---------------|----------|----------------|----------------|
| D1        | 11,449,796 | 9,927,703,599  | 746           | 983      | 11.53          | 109,360,175    |
| D2        | 9,792,869  | 7,733,291,052  | 675           | 951      | 11.59          | 119,690,149    |
| D3        | 11,255,431 | 9,564,769,304  | 723           | 981      | 11.53          | 116,001,216    |
| D4        | 14,236,128 | 12,584,438,699 | 732           | 1016     | 11.59          | 61,118,341     |
| D5        | 11,503,329 | 9,379,344,639  | 707           | 961      | 11.64          | 98,946,695     |
| U1        | 9,171,036  | 7,737,779,710  | 701           | 1003     | 11.49          | 109,699,478    |
| U2        | 10,753,125 | 9,199,369,288  | 723           | 975      | 11.50          | 113,071,934    |
| U3        | 7,654,475  | 6,240,728,116  | 691           | 980      | 11.61          | 120,907,938    |
| U4        | 9,805,641  | 8,331,498,610  | 720           | 989      | 11.53          | 105,973,868    |
| U5        | 11,293,547 | 9,835,274,972  | 717           | 1023     | 11.54          | 98,721,393     |

**Table S2** Comparison of limit of quantification (LOQ) of Oxford Nanopore Technologies (ONT) sequencing, Illumina short read sequencing (SRS) and Illumina reads down-sampled to average nucleotide coverage of ONT reads. LOQ calculated by Anaquin (Wong et al. 2017).

| Sequencing Approach   | LOQ genes (attoml/μl) |             | LOQ isoforms (attoml/μl) |             |
|-----------------------|-----------------------|-------------|--------------------------|-------------|
|                       | Sequin MixA           | Sequin MixB | Sequin MixA              | Sequin MixB |
| Illumina reads (SRS)  | -                     | -           | -                        | 0.0197      |
| Down-sampled Illumina | 0.118                 | 0.118       | 0.059                    | 0.0674      |
| Nanopore reads (ONT)  | 0.118                 | 0.472       | 0.059                    | 0.270       |

**Table S3** Differential gene and transcript expression at a stringent filter of  $\log_{2}FC \geq 1.5$ , FDR q-value  $< 0.05$  (see also Figures 3A and 3C). Bracketed numbers refer to the portion of total that are TALON-identified novel transcripts. U = undifferentiated and D = differentiated cells, with arrows displaying expression directionality.

| Metric                                           | Count      |                          |
|--------------------------------------------------|------------|--------------------------|
|                                                  | Gene level | Transcript level (Talon) |
| $\uparrow U \downarrow D (\geq +1.5 \log_{2}FC)$ | 524        | 875 (21)                 |
| $\uparrow D \downarrow U (\leq -1.5 \log_{2}FC)$ | 503        | 884 (28)                 |

**Table S4** N=104 Differential transcript usage switches with functional consequence ranked by q-value. Output from IsoformSwitchAnalyzeR (Vitting-Seerup and Sandelin 2019). See main methods for functional analysis.

| Ensembl_geneID  | gene_name | condition_1    | condition_2      | gene_switch_q_value |
|-----------------|-----------|----------------|------------------|---------------------|
| ENSG00000086848 | ALG9      | Differentiated | Undifferentiated | 1.51E-26            |
| ENSG00000118363 | SPCS2     | Differentiated | Undifferentiated | 1.83E-21            |
| ENSG00000221838 | AP4M1     | Differentiated | Undifferentiated | 9.67E-18            |
| ENSG00000088986 | DYNLL1    | Differentiated | Undifferentiated | 4.99E-12            |
| ENSG00000167113 | COQ4      | Differentiated | Undifferentiated | 1.25E-11            |
| ENSG00000112769 | LAMA4     | Differentiated | Undifferentiated | 1.41E-11            |
| ENSG00000164117 | FBXO8     | Differentiated | Undifferentiated | 1.95E-10            |
| ENSG00000101460 | MAP1LC3A  | Differentiated | Undifferentiated | 1.57E-08            |
| ENSG00000108384 | RAD51C    | Differentiated | Undifferentiated | 4.19E-08            |
| ENSG00000172053 | QARS      | Differentiated | Undifferentiated | 1.08E-07            |
| ENSG00000169738 | DCXR      | Differentiated | Undifferentiated | 2.91E-07            |
| ENSG00000160789 | LMNA      | Differentiated | Undifferentiated | 3.67E-07            |
| ENSG00000140416 | TPM1      | Differentiated | Undifferentiated | 7.53E-07            |
| ENSG00000172081 | MOB3A     | Differentiated | Undifferentiated | 1.23E-06            |

|                 |           |                |                  |             |
|-----------------|-----------|----------------|------------------|-------------|
| ENSG00000151148 | UBE3B     | Differentiated | Undifferentiated | 1.52E-06    |
| ENSG00000146282 | RARS2     | Differentiated | Undifferentiated | 2.19E-06    |
| ENSG00000221926 | TRIM16    | Differentiated | Undifferentiated | 6.06E-06    |
| ENSG00000163738 | MTHFD2L   | Differentiated | Undifferentiated | 2.28E-05    |
| ENSG00000108591 | DRG2      | Differentiated | Undifferentiated | 3.53E-05    |
| ENSG00000179632 | MAF1      | Differentiated | Undifferentiated | 3.79E-05    |
| ENSG00000158604 | TMED4     | Differentiated | Undifferentiated | 4.45E-05    |
| ENSG00000068024 | HDAC4     | Differentiated | Undifferentiated | 9.36E-05    |
| ENSG00000285437 | POLR2J3   | Differentiated | Undifferentiated | 0.000105381 |
| ENSG00000125755 | SYMPK     | Differentiated | Undifferentiated | 0.000216866 |
| ENSG00000056972 | TRAF3IP2  | Differentiated | Undifferentiated | 0.000341384 |
| ENSG00000089486 | CDIP1     | Differentiated | Undifferentiated | 0.000365387 |
| ENSG00000163053 | SLC16A14  | Differentiated | Undifferentiated | 0.000516673 |
| ENSG00000171469 | ZNF561    | Differentiated | Undifferentiated | 0.000538662 |
| ENSG00000055044 | NOP58     | Differentiated | Undifferentiated | 0.000654218 |
| ENSG00000107317 | PTGDS     | Differentiated | Undifferentiated | 0.000728674 |
| ENSG00000165792 | METTL17   | Differentiated | Undifferentiated | 0.000728674 |
| ENSG00000127125 | PPCS      | Differentiated | Undifferentiated | 0.00074317  |
| ENSG00000184347 | SLIT3     | Differentiated | Undifferentiated | 0.000875632 |
| ENSG00000104870 | FCGRT     | Differentiated | Undifferentiated | 0.000913016 |
| ENSG00000180596 | HIST1H2BC | Differentiated | Undifferentiated | 0.000978953 |
| ENSG00000131711 | MAP1B     | Differentiated | Undifferentiated | 0.0010522   |
| ENSG00000179029 | TMEM107   | Differentiated | Undifferentiated | 0.0010522   |
| ENSG00000140995 | DEF8      | Differentiated | Undifferentiated | 0.001148515 |
| ENSG00000135931 | ARMC9     | Differentiated | Undifferentiated | 0.001238557 |

|                 |         |                |                  |             |
|-----------------|---------|----------------|------------------|-------------|
| ENSG00000161800 | RACGAP1 | Differentiated | Undifferentiated | 0.001494161 |
| ENSG00000146540 | C7orf50 | Differentiated | Undifferentiated | 0.001536413 |
| ENSG00000183092 | BEGAIN  | Differentiated | Undifferentiated | 0.001547641 |
| ENSG00000123178 | SPRYD7  | Differentiated | Undifferentiated | 0.001966476 |
| ENSG00000003756 | RBM5    | Differentiated | Undifferentiated | 0.00235666  |
| ENSG00000166444 | ST5     | Differentiated | Undifferentiated | 0.00235666  |
| ENSG00000124222 | STX16   | Differentiated | Undifferentiated | 0.002830477 |
| ENSG00000196704 | AMZ2    | Differentiated | Undifferentiated | 0.002854375 |
| ENSG00000164466 | SFXN1   | Differentiated | Undifferentiated | 0.00306238  |
| ENSG00000198408 | OGA     | Differentiated | Undifferentiated | 0.003637501 |
| ENSG00000197372 | ZNF675  | Differentiated | Undifferentiated | 0.004074968 |
| ENSG00000099330 | OCEL1   | Differentiated | Undifferentiated | 0.004090568 |
| ENSG00000257591 | ZNF625  | Differentiated | Undifferentiated | 0.00422435  |
| ENSG00000064490 | RFXANK  | Differentiated | Undifferentiated | 0.004622242 |
| ENSG00000136490 | LIMD2   | Differentiated | Undifferentiated | 0.006030149 |
| ENSG00000131477 | RAMP2   | Differentiated | Undifferentiated | 0.006540547 |
| ENSG00000184787 | UBE2G2  | Differentiated | Undifferentiated | 0.006598612 |
| ENSG00000196465 | MYL6B   | Differentiated | Undifferentiated | 0.007142517 |
| ENSG00000132692 | BCAN    | Differentiated | Undifferentiated | 0.007231216 |
| ENSG00000138606 | SHF     | Differentiated | Undifferentiated | 0.007762126 |
| ENSG00000151353 | TMEM18  | Differentiated | Undifferentiated | 0.007989728 |
| ENSG00000197122 | SRC     | Differentiated | Undifferentiated | 0.008177219 |
| ENSG00000160013 | PTGIR   | Differentiated | Undifferentiated | 0.008905808 |
| ENSG00000111581 | NUP107  | Differentiated | Undifferentiated | 0.009183614 |
| ENSG00000197771 | MCMBP   | Differentiated | Undifferentiated | 0.009700325 |



|                 |           |                |                  |             |
|-----------------|-----------|----------------|------------------|-------------|
| ENSG00000137434 | C6orf52   | Differentiated | Undifferentiated | 0.009711457 |
| ENSG00000198551 | ZNF627    | Differentiated | Undifferentiated | 0.00989504  |
| ENSG00000066379 | ZNRD1     | Differentiated | Undifferentiated | 0.01087531  |
| ENSG00000062194 | GPBP1     | Differentiated | Undifferentiated | 0.011249117 |
| ENSG00000166471 | TMEM41B   | Differentiated | Undifferentiated | 0.011305356 |
| ENSG00000174628 | IQCK      | Differentiated | Undifferentiated | 0.012469732 |
| ENSG00000227051 | C14orf132 | Differentiated | Undifferentiated | 0.013453422 |
| ENSG00000141298 | SSH2      | Differentiated | Undifferentiated | 0.013885209 |
| ENSG00000121413 | ZSCAN18   | Differentiated | Undifferentiated | 0.014960611 |
| ENSG00000151617 | EDNRA     | Differentiated | Undifferentiated | 0.016912634 |
| ENSG00000166407 | LMO1      | Differentiated | Undifferentiated | 0.017290737 |
| ENSG00000100888 | CHD8      | Differentiated | Undifferentiated | 0.01754742  |
| ENSG00000276234 | TADA2A    | Differentiated | Undifferentiated | 0.018780264 |
| ENSG00000198663 | C6orf89   | Differentiated | Undifferentiated | 0.020507021 |
| ENSG00000205339 | IPO7      | Differentiated | Undifferentiated | 0.020514719 |
| ENSG00000136146 | MED4      | Differentiated | Undifferentiated | 0.02127913  |
| ENSG00000004897 | CDC27     | Differentiated | Undifferentiated | 0.022166596 |
| ENSG00000119559 | C19orf25  | Differentiated | Undifferentiated | 0.024137326 |
| ENSG00000060982 | BCAT1     | Differentiated | Undifferentiated | 0.024277036 |
| ENSG00000196482 | ESRRG     | Differentiated | Undifferentiated | 0.027583627 |
| ENSG00000139182 | CLSTN3    | Differentiated | Undifferentiated | 0.027739353 |
| ENSG00000204653 | ASPDH     | Differentiated | Undifferentiated | 0.028996139 |
| ENSG00000106635 | BCL7B     | Differentiated | Undifferentiated | 0.029720469 |
| ENSG00000144401 | METTL21A  | Differentiated | Undifferentiated | 0.029949427 |
| ENSG00000135090 | TAOK3     | Differentiated | Undifferentiated | 0.033871798 |

|                 |          |                |                  |             |
|-----------------|----------|----------------|------------------|-------------|
| ENSG00000149292 | TTC12    | Differentiated | Undifferentiated | 0.033913158 |
| ENSG00000171953 | ATPAF2   | Differentiated | Undifferentiated | 0.034218455 |
| ENSG00000080986 | NDC80    | Differentiated | Undifferentiated | 0.034297085 |
| ENSG00000105321 | CCDC9    | Differentiated | Undifferentiated | 0.034903122 |
| ENSG00000135541 | AHI1     | Differentiated | Undifferentiated | 0.035365825 |
| ENSG00000122490 | PQLC1    | Differentiated | Undifferentiated | 0.036240151 |
| ENSG00000174353 | STAG3L3  | Differentiated | Undifferentiated | 0.038682053 |
| ENSG00000140939 | NOL3     | Differentiated | Undifferentiated | 0.04412664  |
| ENSG00000147548 | NSD3     | Differentiated | Undifferentiated | 0.044278588 |
| ENSG00000104231 | ZFAND1   | Differentiated | Undifferentiated | 0.044308667 |
| ENSG00000107951 | MTPAP    | Differentiated | Undifferentiated | 0.044598461 |
| ENSG00000166398 | KIAA0355 | Differentiated | Undifferentiated | 0.046626246 |
| ENSG00000259431 | THTPA    | Differentiated | Undifferentiated | 0.047528021 |
| ENSG00000135249 | RINT1    | Differentiated | Undifferentiated | 0.047949428 |
| ENSG00000136574 | GATA4    | Differentiated | Undifferentiated | 0.048524879 |

## CITATIONS

- Kelley, Lawrence A., Stefans Mezulis, Christopher M. Yates, Mark N. Wass, and Michael J. E. Sternberg. 2015. "The Phyre2 Web Portal for Protein Modeling, Prediction and Analysis." *Nature Protocols* 10 (6): 845–58.
- Vitting-Seerup, Kristoffer, and Albin Sandelin. 2019. "IsoformSwitchAnalyzeR: Analysis of Changes in Genome-Wide Patterns of Alternative Splicing and Its Functional Consequences." *Bioinformatics* 35 (21): 4469–71.
- Wong, Ted, Ira W. Deveson, Simon A. Hardwick, and Tim R. Mercer. 2017. "ANAQUIN: A Software Toolkit for the Analysis of Spike-in Controls for next Generation Sequencing." *Bioinformatics* 33 (11): 1723–24.
- Wyman, Dana, Gabriela Balderrama-Gutierrez, Fairlie Reese, Shan Jiang, Sorena Rahmanian, Stefania Forner, Dina Matheos, et al. 2020. "A Technology-Agnostic Long-Read Analysis Pipeline for Transcriptome Discovery and Quantification." *bioRxiv*. <https://doi.org/10.1101/672931>.
